# Supplementary material for: GC-MS and Cellular Toxicity Studies on Smokeless-Tobacco Show Alerting Cytotoxic effect on Human Gingiva and Lung Fibroblasts
Source: Hindawi journal article supplement (doi:10.1155/2022/4005935), 2022-05-26
Supplement: f1 [file 4005935.f1.docx]

**Supplementary file:**

**Figure S1.** GC-MS chromatograms of eleven SLT samples (S1-S11) showing major identified compounds.

| 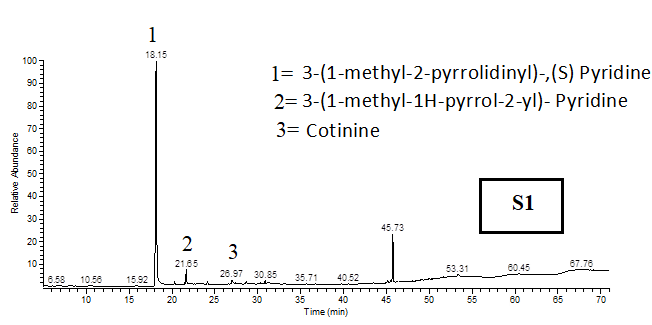 |
| --- |
| 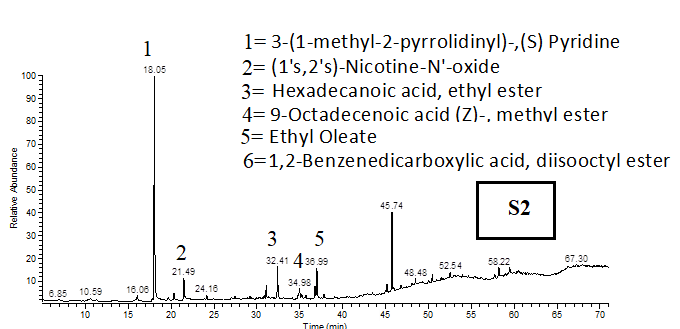 |
| 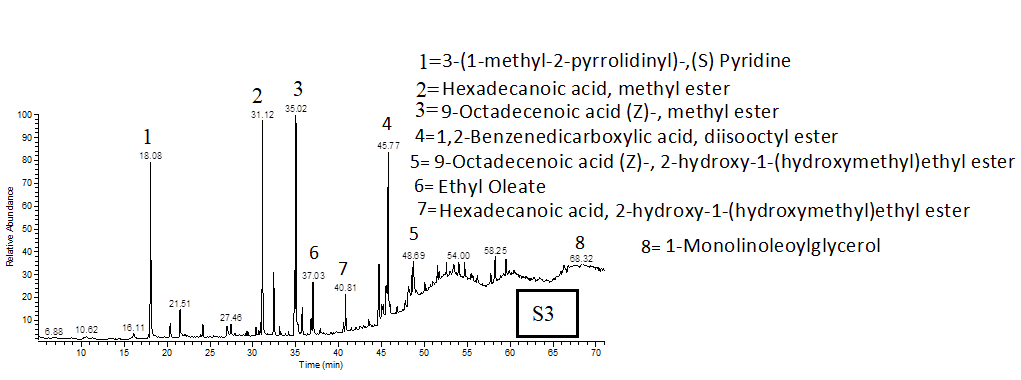 |
| 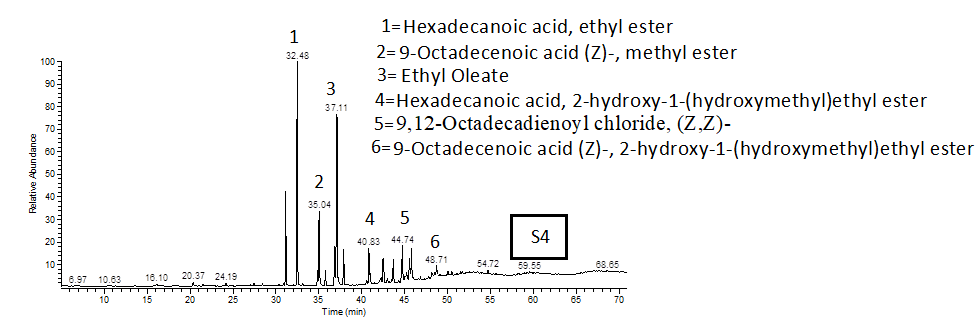 |
| 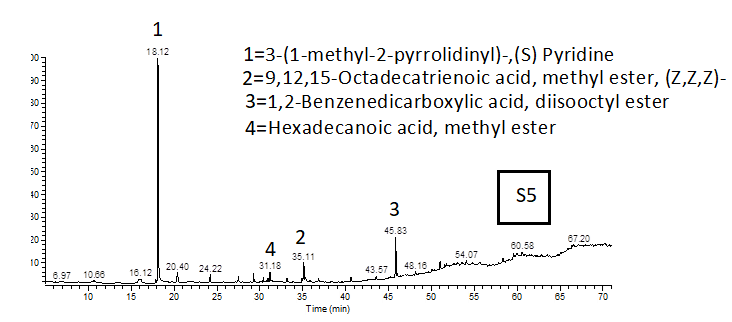 |
| 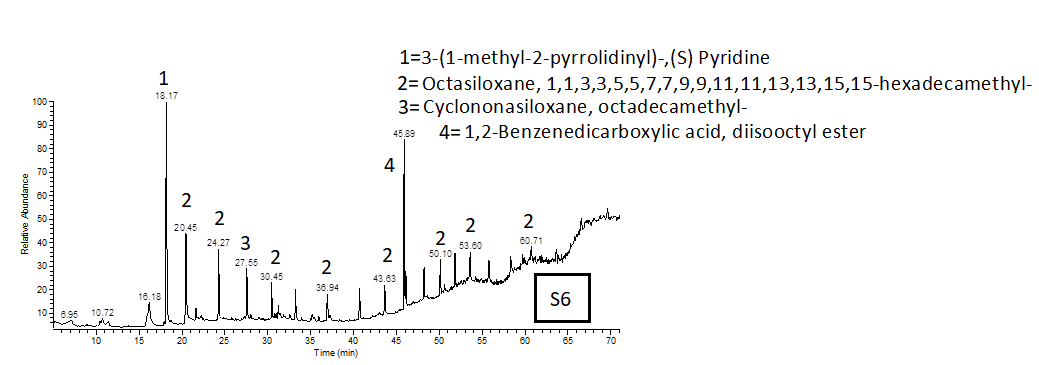 |
| 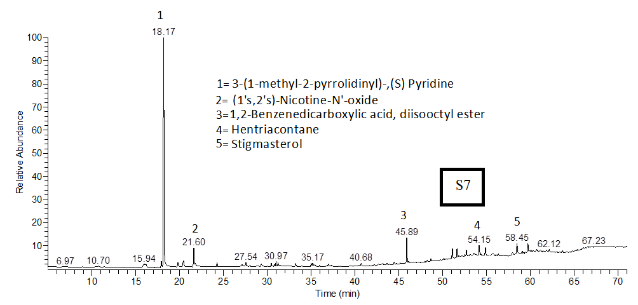 |
| 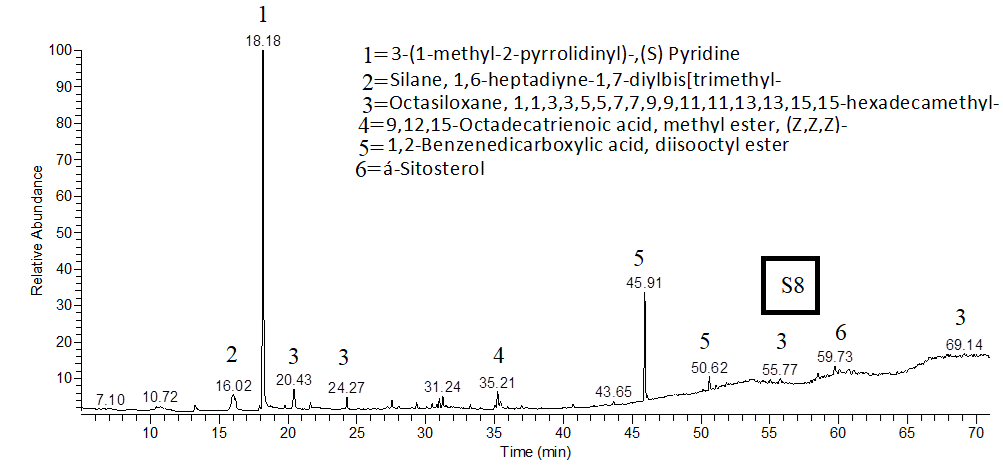 |
| 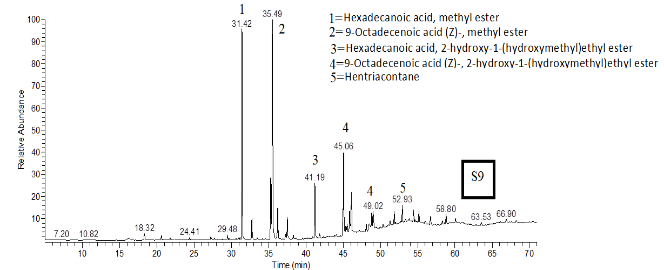 |
| 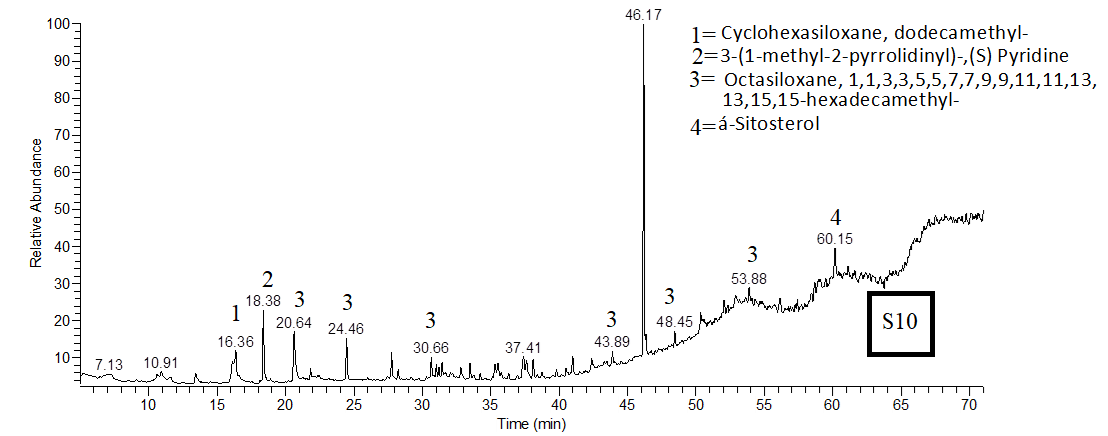 |
| 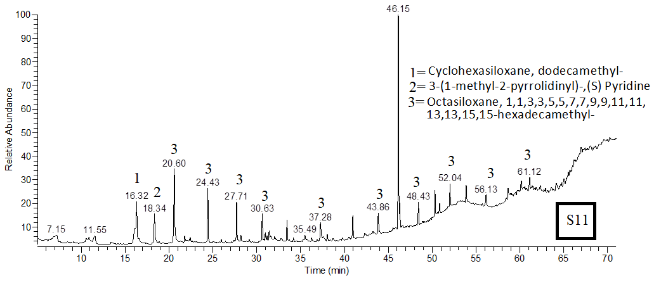 |

**Table 1S:** GC-MS analysis of SLT samples showing all the samples with peak area% of 0.1 and higher

| **No.** | **RT** | **Chemical constituents** | **Area% /Peak area in million** | | | | | | | | | | | **MW** | **MF** | **Identification** |
| --- | --- | --- | --- | --- | --- | --- | --- | --- | --- | --- | --- | --- | --- | --- | --- | --- |
| **S1** | **S2** | **S3** | **S4** | **S5** | **S6** | **S7** | **S8** | **S9** | **S10** | **S11** |
|  | 5.52 | 1-Isopropoxy-5-propyl-2,3-bis-trimethylsilyl-1,2-dihydroborinine |  |  |  |  |  |  |  |  |  | 1.94/102 | 0.57/20 | 322 | C17H35BOSi2 | Silane derivative |
|  | 6.84 | 9,12,15-Octadecatrienoic acid, 2-[(trimethylsilyl)oxy]-1-[[(trimethylsilyl)oxy]methyl]ethyl ester, (Z,Z,Z)- | 0.54/267 | 6.88 /824 | 1.77/321 | 0.56/229 | 5.20/368 | 5.30/277 | 3.09/266 | 6.92/363 | 0.35/111 | 4.59/171 | 4.60/154 | 496 | C27H52O4Si2 | Silane derivative |
|  | 7.08 | 6-Chloro-3-(2-nitro-1-phenylethyl)-3,4-dihydro-1H-naphthalen-2-one |  |  |  |  | 0.32/23 |  |  |  |  |  |  | 329 | C18H16ClNO3 | Aromatic comd. / Naphthalene deriv. |
|  | 7.23 | Benzaldehyde, 2-nitro-4-trimethylsilyl- | -- | 0.16/18 | -- | -- | 0.13/09 | 0.1/05 | --- | -- | -- | -- | 1.42/51 | 223 | C10H13NO3Si | Aromatic aldehyde |
|  | 8.12 | Tetraacetyl-d-xylonic nitrile | 0.22/1 |  |  |  |  |  |  |  |  | 0.29/12 |  | 343 | C14H17NO9 | Nitrile deriv. |
|  | 8.17 | N-[3,5-Dinitropyridin-2-yl]glutamic acid |  | 0.13/14 |  |  |  |  |  |  |  |  |  | 314 | C10H10N4O8 | Pyridine deriv. |
|  | 8.82 | Pregn-5-ene-3,20-diol-13-carboxylic acid, 3-acetate-18,20-lactone |  |  | 0.11/17 |  |  |  |  |  |  |  |  | 372 | C23H32O4 | Sterol deriv. |
|  | 8.88 | Acetic acid, [6,8,9-trimethyl-4-(3,4-methylenedioxyphenyl)-3-oxabicyclo[3.3.1]non-6-en-1-yl)methyl ester |  |  |  |  |  |  | 0.17/14 |  |  |  |  | 358 | C21H26O5 | Organic acid deriv. |
|  | 8.91 | 3,6,9,12-Tetraoxatetradecan-1-ol, 14-[4-(1,1,3,3-tetramethylbutyl)phenoxy]- |  |  |  |  |  | 0.17/09 |  |  |  |  |  | 426 | C24H42O6 | Aliphatic alcohol deriv. |
|  | 9.08 | Tetrasiloxane, 1,1,3,3,5,5,7,7-octamethyl- |  |  |  |  |  |  |  |  |  | 0.15/06 | 0.23/08 | 282 | C8H26O3Si4 | Silane derivative |
|  | 10.26 | Undecane | 0.11/5 | 0.3/33 | 0.14/22 |  | 0.32/23 | 0.38/20 | 0.22/19 | 0.31/16 |  |  | 0.48/17 | 156 | C11H24 | Aliphatic compound |
|  | 10.56 | Benzoic acid, methyl ester | 0.19/91 | 0.53/59 |  |  | 0.65/47 |  |  |  |  |  |  | 136 | C8H8O2 | Aromatic acid ester |
|  | 10.62 | 1-Propanol, 2,2-dimethyl-, benzoate |  |  | 0.23/38 |  |  |  |  |  | 0.11/34 |  | 0.47/17 | 192 | C12H16O2 | Aliphatic alcohol deriv. |
|  | 10.63 | 3-Deoxy-L-ribose-2,5-dibenzoate |  |  |  | 0.11/43 |  | 0.67/36 |  |  |  | 0.8/34 |  | 342 | C19H18O6 | Monosaccharide deriv. |
|  | 10.7 | N-Benzyl-2-aminocinnamate, methyl |  |  |  |  |  |  | 0.43/37 |  |  |  |  | 267 | C17H17NO2 | Aromatic ester |
|  | 11.32 | d-Glycero-l-gluco-heptose |  |  | 0.12/20 |  |  |  |  |  |  | 0.3/13 |  | 210 | C7H14O7 | Glycerol deriv. |
|  | 11.39 | 9-Octadecenoic acid, (2-phenyl-1,3-dioxolan-4-yl)methyl ester, cis- |  |  |  |  | 0.18/12 |  |  | 0.98/53 |  | 0.87/36 | 0.12/04 | 444 | C28H44O4 | Fatty acid ester |
|  | 11.44 | Silane, [[3,3-dimethyl-4-methylene-2-(trimethylsilyl)-1-cyclopenten-1-yl]methoxy]trimethyl- |  |  |  |  |  | 0.47/25 |  | 3.85/208 |  |  |  | 282 | C15H30OSi2 | Silane derivative |
|  | 11.56 | 2-(O-Trimethylsilyloxyphenyl)-1- | -- | 0.21/23 | -- | -- | -- | -- | -- | -- | -- | -- | 1.12/40 | 282 | C14H26O2Si2 | Silane derivative |
|  | 11.63 | Benzoic acid, 2-[(trimethylsilyl)oxy]-, trimethylsilyl ester |  |  |  |  |  |  |  |  |  | 0.37/16 |  | 282 | C13H22O3Si2 | Silane derivative |
|  | 13.11 | Cyclohexanol, 5-methyl-2-(1-methylethyl)-, (1à,2á,5á)- |  | 0.11/11 |  |  |  |  |  |  |  |  |  | 156 | C10H20O | Cyclohexanol deriv. |
|  | 13.24 | Cyclohexanol, 5-methyl-2-(1-methylethyl)-, [1R-(1à,2á,5à)]- |  |  |  |  |  |  |  | 0.9/48 |  | 0.74/32 | 0.3/11 | 156 | C10H20O | Cyclohexanol deriv. |
|  | 13.33 | 3,3'-Hexamethylenbis(1,5,8,11-tetraoxacyclotridecane) |  | 0.11/12 |  |  |  |  |  |  |  |  |  | 462 | C24H46O8 | Cyclotridecane deriv. |
|  | 13.39 | 1,9-Dioxa-5-thianonane, 3,7-bis(9-borabicyclo[3.3.1]non-9-yloxy)-1,9-diphenyl- |  |  |  |  | 0.12/08 |  |  |  |  |  |  | 574 | C34H48B2O4S | Diphenyl deriv. |
|  | 13.44 | 1-Trimethylsilyloxy-9-dodecyne |  |  |  |  |  | 0.1/05 |  |  |  |  |  | 254 | C15H30OSi | Silane derivative |
|  | 13.71 | 1,3-Heptadiyne, 6-(2-methoxyethoxymethoxy)-1-trimethylsilyl- |  |  |  |  |  | 0.1/05 |  |  |  |  |  | 268 | C14H24O3Si | Silane derivative |
|  | 16.06 | Silane, 1,6-heptadiyne-1,7-diylbis[trimethyl- | -- | 1.02/143 | -- | --- | 2/145 | -- | --- | 3.85/194 | -- | --- | -- | 236 | C13H24Si2 | Silane derivative |
|  | 16.36 | Cyclohexasiloxane, dodecamethyl- | -- | -- | --- | -- | -- | 3.1/168 | -- | --- | 0.45/144 | 1.83/79 | 4.82/175 | 444 | C12H36O6Si6 | Siloxane deriv. |
|  | 17.8 | 1,2,3,6-Tetrahydro-2,3'-bipyridine |  | 0.24/27 | 0.16/26 |  | 0.44/31 | 0.16/08 | 0.9/79 | 0.31/16 |  |  |  | 160 | C10H12N2 | Pyridine deriv. |
|  | 18.13 | 1-(2-Nitrophenyl)piperazine |  |  |  |  |  |  |  |  |  | 0.1/04 |  | 207 | C10H13N3O2 | Piperazine deriv. |
|  | 18.15 | 3-(1-Methyl-2-pyrrolidinyl)-,(S) pyridine | 64.91/31716 | 27.15/3034 | 8.94/1497 | 0.16/67 | 33.15/2412 | 12.17/659 | 38.29/3388 | 32.58/1766 | 0.65/209 | 3.48/152 | 2.6/94 | 162 | C10H14N2 | Pyridine deriv. |
|  | 18.58 | 4-Butylbenzoic acid, 2-tetrahydrofurylmethyl ester |  | 0.12/13 |  |  |  |  |  | 0.15/08 |  |  |  | 262 | C16H22O3 | Aromatic acid ester |
|  | 18.70 | Propanoic acid, 2-methyl-, 3-hydroxy-2,4,4-trimethylpentyl ester |  |  |  |  |  | 0.1/05 |  |  |  | 0.12/05 | 0.14/04 | 216 | C12H24O3 | Organic acid deriv. |
|  | 19.66 | 1,2,3-Triazole-4-carbohydrazide, N2-(4-hydroxybenzylidene)-5-chloro- |  | 0.4/45 | 0.12/20 |  |  |  |  | 0.37/20 |  |  |  | 265 | C10H8ClN5O2 | Triazole deriv. |
|  | 19.76 | Tetracyclo[3.3.1.1(3,7).0(2,9)]decane-2-carbonitrile |  |  |  |  | 0.19/13 |  |  |  |  |  |  | 159 | C11H13N | Tetracyclo decane deriv. |
|  | 19.79 | Imidazo[1,2-a]pyridine-2-propanoic acid, 6-methyl- |  |  |  |  |  |  | 0.78/69 |  |  |  |  | 204 | C11H12N2O2 | Nitrogen heterocyclic deriv. |
|  | 20.30 | Cycloheptasiloxane, tetradecamethyl- | 0.86/419 |  |  | 0.46/187 | 1.96/142 | 5.66/306 | 1.56/138 | 2.78/150 | 0.85/274 | 3.37/147 | 6.16/224 | 518 | C14H42O7Si7 | Silane derivative |
|  | 20.35 | Octasiloxane, 1,1,3,3,5,5,7,7,9,9,11,11,13,13,15,15-hexadecamethyl- | 3.30/1072 | 11.79/1363 | 8.11/1687 | 4.22/1716 | 18.01/1309 | 31.14/1649 | 8.74/765 | 17.21/901 | 1.76/505 | 36.52/1590 | 30.23/1112 | 578 | C16H50O7Si8 | Siloxane deriv. |
|  | 21.49 | (1's,2's)-Nicotine-N'-oxide | 0.12/10 | 3.04/339 | 1.55/258 | 0.24/97 | 0.19/14 | 0.77/41 | 3.64/322 | 0.56/30 | 0.30/95 | 0.82/35 | 0.62/33 | 178 | C10H14N2O | Nicotine oxide, alkaloid |
|  | 21.65 | 3-(1-Methyl-1H-pyrrol-2-yl)- pyridine | 3.82/1868 | -- | --- | -- | -- | -- | -- | --- | -- | -- | -- | 158 | C10H10N2 | Pyridine deriv. |
|  | 21.75 | 1H-Pyrazole, 1-methyl-3-phenyl- |  |  |  |  | 0.5/36 |  |  |  |  |  |  | 158 | C10H10N2 | Pyrazole deriv. |
|  | 21.80 | 3-p-Tolyl-isoxazole-4,5-dione dioxime |  |  |  |  |  |  |  | 0.57/30 |  |  |  | 219 | C10H9N3O3 | Isoxazole deriv. |
|  | 22.05 | Phenol, 2,6-bis(1,1-dimethylethyl)- |  | 0.1/11 | 0.15/25 |  |  |  |  |  |  |  |  | 206 | C14H22O | Phenol deriv. |
|  | 22.05 | (7R,8R,S) Ethyl 8-ethoxy-trans-bicyclo[4.3.0]-3-nonene-7-carboxylate |  |  |  |  |  |  |  |  |  |  | 0.29/ 10 | 238 | C14H22O3 | Bicyclononene deriv. |
|  | 22.19 | 2-Trimethylsiloxy-6-hexadecenoic acid, methyl ester | 0.29/143 |  |  |  |  |  |  |  |  |  |  | 356 | C20H40O3Si | Silane derivative |
|  | 22.35 | Acetic acid, 1,4-dioxa-spiro[4.6]undec-6-yl ester |  |  |  |  |  |  |  |  |  | 0.18/07 |  | 214 | C11H18O4 | Acetic acid deriv. |
|  | 22.85 | 10,13-Octadecadiynoic acid, methyl ester | 0.34/166 |  |  |  |  |  |  |  |  |  |  | 290 | C19H30O2 | Higher fatty acid ester |
|  | 22.88 | 7-Methyl-Z-tetradecen-1-ol acetate |  | 0.1/11 |  |  |  |  |  |  |  |  |  | 268 | C17H32O2 | Tetradecaenol deriv. |
|  | 23.09 | 2,3'-Dipyridyl | 0.11/52 |  |  |  |  |  |  |  |  |  |  | 156 | C10H8N2 | Pyridine deriv. |
|  | 23.22 | 5,8,11-Eicosatriynoic acid, methyl ester | 0.15/73 |  |  |  |  |  |  |  |  |  |  | 314 | C21H30O2 |  |
|  | 23.9 | Cyclopenta[1,3]cyclopropa[1,2]cyclohepten-3(3aH)-one, 1,2,3b,6,7,8-hexahydro-6,6-dimethyl- |  | 0.32/72 |  |  |  |  |  |  |  |  |  | 190 | C13H18O | Cycloheptenone deriv. |
|  | 24.13 | Diethyl Phthalate | 0.67/326 |  |  |  |  |  |  |  |  |  |  | 222 | C12H14O4 | Phthalic acid deriv. |
|  | 24.27 | Cyclooctasiloxane, hexadecamethyl- |  |  |  |  |  | 3.69/199 |  |  | 0.23/74 | 1.9/83 | 3.55/129 | 592 | C16H48O8Si8 | Silane derivative |
|  | 25.42 | 2-Cyclohexen-1-one, 4-(3-hydroxy-1-butenyl)-3,5,5-trimethyl-, [R-[R*,R*-(E)]]- |  |  | 0.1/16 |  |  |  |  |  |  |  |  | 208 | C13H20O2 | Cyclohexenone deriv. |
|  | 26.17 | 12,15-Octadecadiynoic acid, methyl ester | 0.13/62 |  | 0.24/33 |  |  |  |  |  |  |  |  | 290 | C19H30O2 | Higher fatty acid ester |
|  | 26.97 | Cotinine | 1.61/788 | -- | 0.94/157 |  | -- | -- | 0.93/82 | --- | -- | -- | -- | 176 | C10H12N2O | Alkaloid, an analog of nicotine |
|  | 26.99 | Methyl tetradecanoate |  |  |  | 0.22/91 | 0.28/20 |  | 0.19/17 |  | 0.44/143 |  |  | 242 | C15H30O2 | Fatty acid ester |
|  | 27.1 | Octadecane, 6-methyl- |  | 0.5/56 |  |  |  |  |  |  |  |  | 0.25/08 | 268 | C19H40 | Aliphatic alkane |
|  | 27.24 | Tetradecane, 2,6,10-trimethyl- |  |  |  |  |  |  |  | .67/35 |  | 0.6/26 |  | 240 | C17H36 | Aliphatic alkane |
|  | 27.55 | Cyclononasiloxane, octadecamethyl- | -- | --- | -- | -- | -- | 2.54/137 | -- | --- | -- | -- | -- | 666 | C18H54O9Si9 | Siloxane deriv. |
|  | 27.85 | 4-(3,3-Dimethyl-but-1-ynyl)-4-hydroxy-2,6,6-trimethylcyclohex-2-enone | 0.16/80 |  |  |  |  |  |  |  |  |  |  | 234 | C15H22O2 | Cyclohexenone deriv. |
|  | 27.92 | Ethanol, 1-(methylenecyclopropyl)-1-(methylene-1-trimethylsilylcyclopropyl)- |  |  | 0.14/24 |  |  |  |  |  |  |  |  | 222 | C13H22OSi | Silane derivative |
|  | 28.02 | 1-Cyclohexene-1-acrylic acid, 2,6,6-trimethyl-3-oxo-, methyl ester |  |  |  |  |  | 0.23/12 |  |  |  |  |  | 222 | C13H18O3 | Acrylic acid deriv. |
|  | 28.44 | l-Gala-l-ido-octose |  |  | 0.1/17 |  | 0.58/40 | 0.11/05 | 0.15/13 | 0.2/10 |  |  | 0.22/06 | 240 | C8H16O8 | Monosaccharide deriv. |
|  | 28.44 | Tetradecanoic acid, ethyl ester |  |  |  | 0.25/103 |  |  |  |  |  |  |  | 256 | C16H32O2 | Fatty acid ester |
|  | 28.67 | Tetracyclo[4.4.1.1(7,10).0(2,5)]dodec-3-en-11-ol | 1.01/494 | -- | --- | -- | -- | -- | -- | --- | -- | -- | -- | 176 | C12H16O | A tetracyclic alkene |
|  | 28.79 | Acetamide, N-methyl-N-[4-(3-hydroxypyrrolidinyl)-2-butynyl]- |  |  |  |  |  |  | 0.1/9 |  |  |  |  | 210 | C11H18N2O2 |  |
|  | 28.88 | [1,1'-Bicyclopropyl]-2-octanoic acid, 2'-hexyl-, methyl ester |  | 0.4/43 | 0.94/157 |  |  |  |  |  | 0.1/31 |  |  | 322 | C21H38O2 | Octanoic acid ester |
|  | 28.99 | 2-(3-Isopropyl-4-methyl-pent-3-en-1-ynyl)-2-methyl-cyclobutanone |  |  |  |  |  |  | 0.14/12 |  |  |  |  | 204 | C14H20O | Cyclobutanone deriv. |
|  | 29.27 | 3,7,11,15-Tetramethyl-2-hexadecen-1-ol | -- | 0.25/28 | 0.17/28 | -- | 1.23/89 | -- | 0.35/31 | 0.51/27 | 0.60/193 | -- | -- | 296 | C20H40O | Higher alkene |
|  | 29.32 | Ethanol, 2-(9-octadecenyloxy)-, (Z)- |  |  |  |  |  | 0.1/05 |  |  |  |  |  | 312 | C20H40O2 | Ethanol deriv. |
|  | 29.39 | 2-Pentadecanone, 6,10,14-trimethyl- |  | 0.2/22 | 0.22/37 |  |  |  | 0.12/11 |  |  |  |  | 268 | C18H36O | Aliphatic ketone deriv. |
|  | 29.46 | 2-Undecanone, 6,10-dimethyl- |  |  |  |  | 0.13/09 |  |  |  |  |  |  | 198 | C13H26O | Aliphatic ketone deriv. |
|  | 29.94 | 1,2-Benzenedicarboxylic acid, butyl 2-ethylhexyl ester |  | 0.11/11 |  |  |  |  |  | 0.21/11 |  |  |  | 334 | C20H30O4 | Aromatic acid deriv. |
|  | 30.85 | 7,9-Di-tert-butyl-1-oxaspiro(4,5)deca-6,9-diene-2,8-dione | 0.55/266 | 0.34/38 | 0.49/82 | 0.13/54 |  | 0.28/15 | 0.64/56 |  | 0.60/642 |  |  | 276 | C17H24O3 | oxaspiro(4,5)deca-6,9-diene-2,8-dione deriv. |
|  | 30.92 | Bicyclo[5.1.0]octan-2-one, 4,6-diisopropylidene-8,8-dimethyl- |  |  |  |  | 0.48/34 |  |  | 0.72/39 |  |  | 0.33/11 | 232 | C16H24O | Bicyclo-octan-2-one deriv. |
|  | 31.10 | Hexadecanoic acid, methyl ester | 0.23/110 | 1.52/63 | 9.06/1517 | 7.3/2993 | 1.67/121 | 1.09/59 | 0.1/04 | 0.12/05 | 16.48/534 | 0.61/26 | 0.1/04 | 270 | C17H34O2 | Fatty acid ester |
|  | 30.15 | n-Propylnornicotine |  | 0.17/18 |  |  |  |  |  |  |  |  |  | 190 | C12H18N2 | Nicotine deriv. |
|  | 31.21 | Pent-4-enamine, 2-allyl-2-(2,3-dimethoxyphenyl)- |  |  |  |  |  |  |  |  |  | 0.35/15 |  | 261 | C16H23NO2 | Pent-4-enamine deriv. |
|  | 31.22 | Pentadecanoic acid, 14-methyl-, methyl ester | 0.68/333 |  |  |  |  |  | 0.57/50 | 0.96/52 |  |  | 0.69/25 | 270 | C17H34O2 | Higher fatty acid ester |
|  | 31.27 | Formic acid, 2-bromomethyl-4,4-dimethyl-3-(3-oxobut-1-enyl)cyclohex-2-enyl ester |  |  |  |  |  |  |  |  |  |  |  | 314 | C14H19BrO3 | Formic acid deriv. |
|  | 31.39 | 9-Heptadecene-4,6-diyn-8-ol, (Z)- |  |  |  |  |  |  | 0.34/29 |  |  |  | 0.39/14 | 246 | C17H26O | Unsaturated aliphatic alcohol |
|  | 32.03 | Ethyl 9-hexadecenoate |  |  |  | 0.11/43 |  |  |  |  |  |  |  | 282 | C18H34O2 | Fatty acid ester |
|  | 32.06 | Ethanol, 2-(octadecyloxy)- |  |  |  |  |  |  |  |  |  | 0.16/07 |  | 314 | C20H42O2 | Ethanol deriv. |
|  | 32.41 | Hexadecanoic acid, ethyl ester (Palmitic acid ester) | 0.1/34 | 3.62/404 | 2.81/470 | 19.0/8024 | 0.11/05 | 0.4/02 | 0.11/10 | 0.14/09 | 2.18/705 | 0.85/36 | 0.29/10 | 284 | C18H36O2 | Fatty acid ester |
|  | 33.26 | 6,9,12,15-Docosatetraenoic acid, methyl ester |  | 0.34/37 |  |  |  |  |  |  |  |  |  | 346 | C23H38O2 | Higher fatty acid ester |
|  | 34.17 | Vitamin A aldehyde |  |  | 0.18/30 |  |  |  |  |  | 0.21/65 | 0.36/15 | 0.48/17 | 284 | C20H28O | Vitamin A |
|  | 34.86 | 9,12-Octadecadienoic acid (Z,Z)-, methyl ester |  |  |  | 1.26/517 |  |  | 0.56/49 |  | 5.09/164 |  |  | 294 | C19H34O2 | Fatty acid ester |
|  | 34.98 | 9-Octadecenoic acid (Z)-, methyl ester or  9,12-Octadecadienoyl chloride, (Z,Z)- | 0.12/54 | 2.35/45 | 15/2112 | 3.91/1605 | 0.63/45 | 0.56/30 | 0.77/67 | 0.1/04 | 0.22/71 | 4.40/159 | 1.58/57 | 296 | C19H36O2 | Fatty acid ester |
|  | 33.74 | 9-Octadecenoic acid, (2-phenyl-1,3-dioxolan-4-yl)methyl ester, trans- | 0.1/46 |  |  |  |  |  |  |  |  |  |  | 444 | C28H44O4 | Fatty acid ester |
|  | 34.98 | Cyclopropaneoctanoic acid, 2-[[2-[(2-ethylcyclopropyl)methyl]cyclopropyl]methyl]-, methyl ester | 0.1/49 |  | 0.2/33 |  |  |  |  | 0.38/20 |  |  |  | 334 | C22H38O2 | Cyclopropaneoctanoic acid deriv. |
|  | 35.04 | 11-Octadecenoic acid, methyl ester |  |  |  | 6.74/2765 |  |  |  |  | 21.79/7064 |  |  | 296 | C19H36O2 | Fatty acid ester |
|  | 35.11 | 9,12,15-Octadecatrienoic acid, methyl ester, (Z,Z,Z)- | -- | -- | -- | -- | 3.16/229 | -- | -- | 1.77/95 | -- | -- | -- | 292 | C19H32O2 | Fatty acid ester |
|  | 35.24 | Cholestan-3-ol, 2-methylene-, (3á,5à)- |  | 0.69/77 | 0.15/25 |  |  |  |  |  |  |  |  | 400 | C28H48O | Sterol deriv. |
|  | 35.32 | Phytol | -- | -- | -- | -- | 1.01/73 | 0.26/13 | 0.5/44 | 0.75/40 | -- | 0.2/08 | -- | 296 | C20H40O | Diterpenol |
|  | 35.76 | Octadecanoic acid, methyl ester | 0.24/119 | 0.61/68 | 1.35/225 | 1.3/533 | -- | 0.32/17 | -- | -- | 2.78/899 | 0.26/11 | -- | 298 | C19H38O2 | Fatty acid ester |
|  | 35.96 | Undecanoic acid, 11-bromo-, methyl ester |  |  |  |  |  |  |  | 0.22/11 |  |  |  | 278 | C12H23BrO2 | Organic acid deriv. |
|  | 36.27 | Hexadecanoic acid, 15-methyl-, methyl ester |  |  |  |  |  |  |  |  |  |  | 0.34/12 | 284 | C18H36O2 | Fatty acid ester |
|  | 36.72 | Heptasiloxane, 1,1,3,3,5,5,7,7,9,9,11,11,13,13-tetradecamethyl- | 0.18/89 | 3.05/295 | 1.48/309 | 0.52/213 | 2.22/160 | 4.44/236 | 3.71/324 | 1.23/65 |  | 2.63/113 | 6.26/129 | 504 | C14H44O6Si7 | Silane derivative |
|  | 36.78 | 9,12-Octadecadienoic acid (Z,Z)-methyl ester | -- | 1.55/173 | 2.81/469 | 1.26/583 | -- | -- | -- | -- | -- | -- | -- | 280 | C18H32O2 | Fatty acid ester |
|  | 36.85 | 9,12-Octadecadienoic acid, ethyl ester | -- | 1.55/173 | -- | 3.65/1498 | -- | -- | -- | -- | 0.57/183 | -- | -- | 308 | C20H36O2 | Fatty acid ester |
|  | 37.03 | Ethyl oleate | -- | 4.21/470 | 2.77/464 | 18.52/7600 | -- | -- | -- | -- | 2.03/657 | -- | -- | 310 | C20H38O2 | Fatty acid ester |
|  | 37.25 | Methyl 2-hydroxy-octadeca-9,12,15-trienoate |  |  |  |  |  | 0.61/33 |  | 0.41/22 |  |  |  | 308 | C19H32O3 | Fatty acid este r |
|  | 37.89 | Octadecanoic acid, ethyl ester | -- | 0.74/82 | 0.46/76 | 3.21/1315 | -- | -- | -- | -- |  | -- | -- | 312 | C20H40O2 | Fatty acid ester |
|  | 38.10 | 4,7,10,13,16,19-Docosahexaenoic acid, methyl ester, (all-Z)- |  |  |  |  |  |  |  |  |  | 0.91/39 |  | 342 | C23H34O2 | Higher fatty acid ester |
|  | 39.06 | Isoaromadendrene epoxide |  | 0.41/45 |  |  |  |  | 0.46/40 |  |  |  |  | 220 | C15H24O | Sesquiterpene deriv. |
|  | 39.71 | 1,8-Diazacyclotetradecane- |  |  |  |  |  |  |  |  |  |  |  | 226 | C12H22N2O2 | cyclotetradecane- deriv. |
|  | 39.76 | Methyl 5,7-hexadecadiynoate |  |  |  |  |  |  |  |  |  |  | 0.28/10 | 262 | C17H26O2 | Fatty acid ester |
|  | 39.93 | Octadecanal, 2-bromo- |  |  |  |  |  |  | 0.13/11 |  |  |  |  | 346 | C18H35BrO | Bromoalkane deriv. |
|  | 39.98 | Dodecanoic acid, 3-hydroxy- |  |  |  |  |  |  |  | 0.16/08 |  |  |  | 216 | C12H24O3 | Fatty acid deriv. |
|  | 40.43 | trans-Z-à-Bisabolene epoxide |  |  |  |  |  |  | 0.19/17 |  |  |  |  | 220 | C15H24O | Sesquiterpene deriv. |
|  | 40.81 | Hexadecanoic acid, 2-hydroxy-1-(hydroxymethyl)ethyl ester | 0.6/295 | -- | 3.77/630 | 6.49/2664 | -- | -- | -- | -- | 6.97/8740 | -- | -- | 330 | C19H38O4 | Fatty acid ester |
|  | 41.48 | Methyl 9-methyltetradecanoate |  |  | 0.13/22 |  |  |  |  |  |  |  |  | 256 | C16H32O2 | Higher fatty acid ester |
|  | 41.49 | Eicosanoic acid, methyl ester |  |  |  | 0.11/45 |  |  |  |  | 0.31/102 |  |  | 326 | C21H42O2 | Higher fatty acid ester |
|  | 42.02 | 4,8,12,16-Tetramethylheptadecanoic acid |  |  | 0.24/40 |  |  |  |  |  |  |  |  | 324 | C21H40O2 | Higher fatty acid |
|  | 42.03 | Heptadecane, 2,6,10,15-tetramethyl- | 0.12/85 |  |  |  |  |  |  |  |  | 0.24/10 | 0.16/05 | 296 | C21H44 | Higher alkane |
|  | 42.27 | Spiro[4.5]decan-7-one, 1,8-dimethyl-8,9-epoxy-4-isopropyl- |  |  |  | 0.94/384 |  |  |  |  |  |  |  | 236 | C15H24O2 | Sesquiterpene deriv. |
|  | 42.37 | 4,8,12,16-Tetramethylheptadecan-4-olide |  |  |  |  |  |  |  |  | 0.13/41 |  |  | 324 | C21H40O2 | Higher alkane deriv. |
|  | 42.38 | 5,8,11,14-Eicosatetraynoic acid |  |  |  |  |  |  |  |  |  | 0.91/39 | 0.78/28 | 296 | C20H24O2 | Higher fatty acid |
|  | 42.50 | 1-Heptatriacotanol |  | 0.3/33 | 0.25/41 |  |  |  | 0.12/10 |  | 0.14/45 | 0.46/20 | 0.3/11 | 536 | C37H76O | Higher alcohol |
|  | 42.51 | Heptacosane, 1-chloro- | 0.25/102 |  |  |  |  |  |  |  |  |  |  | 414 | C27H55Cl | Higher haloalkane |
|  | 42.53 | 7-Methyl-Z-tetradecen-1-ol acetate | -- | -- | -- | 3.66/1500 | -- | -- | -- | -- |  | -- | -- | 268 | C17H32O2 | Fatty acid ester |
|  | 42.64 | Cholestan-3-ol, 2-methylene-, (3á,5à)- |  | 0.29/32 |  |  |  |  |  |  |  |  |  | 400 | C28H48O | Sterol deriv. |
|  | 43.16 | Falcarinol |  |  |  |  |  |  | 0.5/43 |  |  |  |  | 244 | C17H24O | natural pesticide and fatty alcohol |
|  | 43.17 | 2-[4-methyl-6-(2,6,6-trimethylcyclohex-1-enyl)hexa-1,3,5-trienyl]cyclohex-1-en-1-carboxaldehyde |  | 0.35/38 |  |  |  | 0.94/50 | 0.46/39 |  |  |  |  | 324 | C23H32O | Trimethylcyclohexene deriv. |
|  | 43.22 | Methyl 15-hydroxy-9,12-octadecadienoate |  |  |  | 0.11/46 |  |  |  |  |  |  |  | 310 | C19H34O3 | Fatty acid deriv. |
|  | 44.46 | 5,8,11-Heptadecatriynoic acid, methyl ester |  |  |  |  |  |  | 0.39/34 |  |  | 0.3/13 |  | 272 | C18H24O2 | Higher fatty acid ester |
|  | 43.68 | cis-10-Heptadecenoic acid | -- | -- | -- | 2.43/995 | -- | -- | -- | -- |  | -- | -- | 268 | C17H32O2 | Higher acid |
|  | 44.99 | Nonadecane |  | 0.36/39 |  |  | 0.19/13 | 0.18/09 |  |  |  |  |  | 268 | C19H40 | Higher alkane |
|  | 45.04 | 1H-Indene, 1-hexadecyl-2,3-dihydro- |  |  |  | 0.52/212 |  |  |  |  |  |  |  | 342 | C25H42 | Indene deriv. |
|  | 45.13 | Eicosane, 2-methyl- |  |  |  |  |  |  | 0.86/75 |  |  |  |  | 296 | C21H44 | Higher alkane |
|  | 45.14 | Methyl 11-docosenoate |  |  |  |  |  |  |  |  |  |  |  | 352 | C23H44O2 | Fatty acid ester |
|  | 45.16 | Erucic acid |  | 1.02/113 |  |  |  |  |  |  |  |  |  | 338 | C22H42O2 | Fatty acid |
|  | 45.20 | trans-9-Octadecenoic acid, trimethylsilyl ester |  |  | 0.71/119 |  |  |  |  |  |  |  |  | 354 | C21H42O2Si | Fatty acid ester |
|  | 45.22 | 16-Hydroxyhexadecanoic acid |  |  |  | 0.87/357 |  |  |  |  |  |  |  | 272 | C16H32O3 | Fatty acid deriv. |
|  | 45.49 | Hexadecanoic acid, 2-hydroxy-1-(hydroxymethyl)ethyl |  |  |  |  |  |  |  |  |  |  |  | 330 | C19H38O4 | Fatty acid deriv. |
|  | 45.53 | Octadecanoic acid, 2-hydroxy-1,3-propanediyl ester | 0.39/191 |  |  |  |  |  |  |  | 0.86/279 |  |  | 624 | C39H76O5 | Fatty acid ester |
|  | 45.73 | 1,2-Benzenedicarboxylic acid, diisooctyl ester | 8.17/3992 | 16.1/2179 | 6.78/484 | 2.41/990 | 5.22/379 | 7.83/424 | 3.83/339 | 9.15/496 | 2.98/967 | 13.33/582 | 14.76/536 | 390 | C24H38O4 | Phthalic acid ester |
|  | 46.78 | Heptacosane | 0.23/111 | 0.84/94 | 1.48/314 | 0.88/359 | 0.94/68 |  | 1.38/121 |  |  |  |  | 380 | C27H56 | Higher alkane |
|  | 46.80 | tert-Hexadecanethiol |  | 0.54/60 | 0.94/157 | 0.42/170 |  | 0.12/06 |  |  |  |  |  | 258 | C16H34S | Aliphatic alcohol |
|  | 46.82 | 7-Hydroxy-6,9a-dimethyl-3-methylene-decahydro-azuleno[4,5-b]furan-2,9-dione |  |  | 0.34/57 |  |  |  |  |  |  |  |  | 264 | C15H20O4 | Furan diobe deriv. |
|  | 47.78 | 16-Trimethylsilyloxy-9-octadecenoic acid, methyl ester |  |  | 0.47/79 |  |  |  |  |  | 0.7/225 |  |  | 384 | C22H44O3Si | Silane derivative |
|  | 48.15 | Glycine, N-[(3à,5á)-24-oxo-3-[(trimethylsilyl)oxy]cholan-24-yl]-, methyl ester |  |  |  | 0.99/408 |  |  |  |  |  |  |  | 519 | C30H53NO4Si | Silane derivative |
|  | 48.39 | 2-Bromo-4,5-dimethoxycinnamic acid |  |  |  |  |  |  |  | 0.18/09 |  |  |  | 286 | C11H11BrO4 | Haloaromatic acid |
|  | 48.5 | Oleic acid, trimethylsilyl ester | -- | -- | -- | -- | -- | -- | -- | -- | 1.41/458 | -- | 0.19/06 | 354 | C21H42O2Si | Fatty acid ester |
|  | 48.51 | Eicosane, 7-hexyl- |  |  | 0.78/130 |  | 1.18/85 |  | 0.23/20 |  |  | 0.21/09 |  | 366 | C26H54 | Higher alkane |
|  | 48.61 | Estra-1,3,5(10)-trien-17á-ol |  |  |  |  |  | 0.45/24 |  |  |  |  |  | 256 | C18H24O | Steroid deriv. |
|  | 48.69 | 9-Octadecenoic acid (Z)-, 2-hydroxy-1-(hydroxymethyl)ethyl ester | -- | -- | 5.91/756 | 1.35/145 | -- | -- | -- | -- | 10.78/3494 | -- | -- | 356 | C21H40O4 | Fatty acid ester |
|  | 49.06 | Octadecanoic acid, 2-hydroxy-1-(hydroxymethyl)ethyl |  |  |  |  |  |  |  |  |  |  |  | 358 | C21H42O4 | Fatty acid deriv. |
|  | 49.09 | Hexadecanoic acid, 1-(hydroxymethyl)-1,2-ethanediyl ester |  |  | 0.34/57 |  |  |  |  |  |  |  |  | 568 | C35H68O5 | Fatty acid ester |
|  | 49.95 | Bicyclo[2.2.1]heptane,2,2,3,5,5-pentachloro-7,7-bis(chloromethyl)-1-dichoromethyl- |  |  |  |  |  |  |  |  | 0.11/34 |  |  | 444 | C10H9Cl9 | Bicyclic heptane deriv. |
|  | 50.51 | 1,2-Benzenedicarboxylic acid, diisodecyl ester | 0.13/64 |  |  | 0.48/195 |  |  |  | 1.21/65 |  |  | 0.8/29 | 446 | C28H46O4 | Phthalic acid deriv. |
|  | 50.61 | Phthalic acid, decyl isohexyl ester |  |  |  |  |  | 0.54/29 |  |  |  |  |  | 390 | C24H38O4 | Phthalic acid deriv. |
|  | 51.02 | 7-hexyl- Eicosane | -- | -- | -- | -- | 1.18/69 | -- | 1.84/162 | -- | -- | -- | -- | 366 | C26H54 | Higher alkane |
|  | 51.08 | Hentriacontane | -- | 0.72/80 | -- | -- | -- | -- | 3.26/286 | -- | 4.84/1566 | -- | -- | 437 | C31H64 | Higher alkane |
|  | 51.48 | Octadecane, 3-ethyl-5-(2-ethylbutyl)- | 0.52/45 | 0.67/74 | 0.37/100 | 0.42/171 | 0.97/69 | 0.46/23 | 1.42/120 | 0.42/22 | 1.57/509 |  | 0.58/19 | 366 | C26H54 | Higher alcohol deriv. |
|  | 51.51 | 1h-Pyrrole-3,4-diacetic acid, 2-acetoxymethyl-5-methoxycarbonyl-, dimethyl ester |  |  |  |  |  |  |  | 0.23/12 |  |  |  | 341 | C15H19NO8 | Pyrrole deriv. |
|  | 51.56 | Pentadecane, 2-methyl- |  |  |  |  | 0.38/27 |  |  |  |  |  |  | 226 | C16H34 | Higher alkane |
|  | 51.68 | Heptasiloxane, hexadecamethyl- | 0.26/128 |  | 0.32/53 |  |  |  |  |  |  |  | 1.65/59 | 532 | C16H48O6Si7 | Silane derivative |
|  | 51.74 | Tetracosamethyl-cyclododecasiloxane |  |  |  | 0.21/84 |  |  |  |  |  |  |  | 666 | C24H72O12Si12 | Silane derivative |
|  | 52.06 | 1-Monolinoleoylglycerol trimethylsilyl ether |  |  | 4.1/671 | 0.81/330 | 4.91/479 | 8.67/445 | 4.73/413 | 4.93/257 | 1.07/345 | 7.90/338 | 4.2/147 | 498 | C27H54O4Si2 | Silane derivative |
|  | 52.41 | 1,2-Cinnolinedicarboxylic acid, 1,2,3,5,6,7,8,8a-octahydro-4-trimethylsilyloxy-, diethyl ester |  |  |  |  |  |  |  | 0.22/11 |  |  |  | -- | C17H30N2O5Si | Silane derivative |
|  | 52.56 | Tetratetracontane |  |  | 0.62/103 |  |  |  |  | 0.46/24 |  |  |  | 618 | C44H90 | Higher alkane |
|  | 52.62 | Eicosane, 3-methyl- |  |  |  |  | 0.93/67 |  |  |  |  |  |  | 296 | C21H44 | Higher alkane |
|  | 52.69 | Tetracosane, 11-decyl- | -- | -- | 0.76/126 | -- | -- | -- | 1/88 | -- | 2.45/796 | -- | -- | 479 | C34H70 | Higher alkane |
|  | 52.98 | Octadecane, 1,1'-[1,3-propanediylbis(oxy)]bis- |  |  | 0.3/51 |  |  |  | 0.28/24 |  |  |  |  | 580 | C39H80O2 | Higher alkane deriv. |
|  | 53.31 | n-Propylnornicotine | 0.77/374 |  |  |  |  |  |  |  |  |  |  | 190 | C12H18N2 | Nicotine deriv. |
|  | 54.89 | 2,4-Imidazolidinedione, 5-[3,4-bis[(trimethylsilyl)oxy]phenyl]-3-methyl-5-phenyl-1-(trimethylsilyl)- |  |  | 0.19/31 |  | 1.1/80 |  |  | 1.05/56 |  |  | 1.44/52 | 578 | C25H40N2O4Si3 | Silane derivative |
|  | 55.44 | 5H-Benzo[b]pyran-8-ol, 2,3,5,5,8a-pentamethyl-6,7,8,8a-tetrahydro- |  | 0.68/76 |  |  |  |  |  |  |  |  |  | 222 | C14H22O2 | Benzopyrane deriv. |
|  | 55.44 | 25-Norisopropyl-9,19-cyclolanostan-22-en-24-one, 3-acetoxy-24-phenyl-4,4,14-trimethyl- |  |  | 0.42/69 |  |  |  |  |  |  |  |  | 516 | C35H48O3 | Triterpene deriv. |
|  | 56.01 | Cholest-5-ene, 3-methoxy-, (3á)- |  |  |  |  |  |  |  |  | 0.35/113 |  |  | 400 | C28H48O | Sterol deriv. |
|  | 57.71 | Ethyl iso-allocholate | -- | 1.01/112 | -- | -- | -- | 0.54/29 | 0.83/73 | -- | 0.24/77 | -- | 0.25/09 | 436 | C26H44O5 | Steroid |
|  | 58.22 | Stigmasterol | -- | 1.99/222 | 1.52/255 | -- | -- | -- | 2.55/225 | -- | 0.87/283 | -- | -- | 412 | C29H48O | Phytosterol |
|  | 58.31 | Campesterol |  |  |  |  |  |  |  |  | 0.49/158 |  |  | 400 | C28H48O | Steroid |
|  | 58.34 | Gorgost-5-en-3-ol, (3á)- |  |  |  |  | 1.03/75 |  |  |  |  |  |  | 426 | C30H50O | Sterol deriv. |
|  | 59.47 | Sitosterol | 0.11/32 | 1.35/150 | 1.19/198 | 0.21/85 | 1.29/93 | 0.13/11 | 2.19/193 | 1.65/89 | 0.48/157 | 2.37/103 | 0.1/21 | 414 | C29H50O | Phytosterol |
|  | 60.05 | 2,4,6-Cycloheptatrien-1-one, 3,5-bis-trimethylsilyl- |  |  |  | 0.10/41 | 1.34/96 |  | 0.64/56 |  |  | 0.42/18 |  | 250 | C13H22OSi2 | Silane derivative |
|  | 60.06 | .psi.,.psi.-Carotene, 1,1',2,2'-tetrahydro-1,1'-dimethoxy- |  |  |  |  |  |  | 0.41/36 | 1.23/66 |  |  |  | 600 | C42H64O2 | Carotene deriv. |
|  | 61.84 | Lupeol |  |  |  |  |  |  | 0.72/63 |  |  |  |  | 428 | C30H50O | Pentacyclic triterpenol |
|  | 66.18 | 1,2-Benzenediol, 3,5-bis(1,1-dimethylethyl)- |  |  |  |  |  |  |  |  |  |  | 0.81/29 | 222 | C14H22O2 | Phenolic deriv. |
|  | 66.26 | 1-Monolinoleoylglycerol trimethylsilyl ether | 0.67/325 | 0.12/48 | 4.1/671 | 0.81/330 | 4.91/479 | 8.67/445 | 4.73/413 | 4.93/257 | 1.07/345 | 7.90/338 | 4.2/147 | 498 | C27H54O4Si2 | Silane derivative |
|  | 66.53 | Cyclodecasiloxane, eicosamethyl- |  |  |  |  |  | 1.25/67 |  |  | 0.35/113 | 1.05/45 |  | --- | C20H60O10Si10 | Siloxane deriv. |
|  | 66.73 | Benzoic acid, 2,5-bis(trimethylsiloxy)-, trimethylsilyl ester |  |  | 0.54/91 |  | 1.32/96 |  |  |  |  |  |  | 370 | C16H30O4Si3 | Aromatic acid deriv. |
|  | 67.45 | (22S)-6á,11á,21-Trihydroxy-16à,17à-propylmethylenedioxypregna-1,4-diene-3,20-dione |  |  |  |  |  | 0.69/37 |  |  |  |  |  | 446 | C25H34O7 | Steroid deriv. |
|  | 68.24 | Tricyclo[20.8.0.0(7,16)]triacontane, 1(22),7(16)-diepoxy- |  |  |  |  |  |  |  |  | 0.33/107 |  |  | 444 | C30H52O2 | Higher alcohol |
|  | 70.32 | Hexasiloxane, tetradecamethyl- | -- | -- | -- | -- | 1.32/131 | -- | -- | -- | -- | -- | -- | 458 | C14H42O5Si6 | Siloxane deriv. |
